# Supplementary material for: Prognostic and diagnostic value of epithelial to mesenchymal transition markers in pulmonary neuroendocrine tumors
Source: PubMed Central journal article supplement (PMC4256901; doi:10.1186/1471-2407-14-855), 2014-11-20
Supplement: 12885_2013_5034_MOESM2_ESM.pdf [file 12885_2013_5034_MOESM2_ESM.pdf]

The interobservers reproducibility of scoring IHC staining has been determined by Kappa statistics for all markers assessed by 2 independent observers. The kappa statistic, defined as the difference between the observed agreements and the agreements expected by chance expressed as a fraction of the maximum possible difference[1] was applied to processed scoring data: 'low' vs. 'high' protein expression levels or 'positive' vs. negative or 'membrane vs. cytoplasmic vs. nuclear immunolocalization'.

A Kappa score <0.20 is regarded as poor, a Kappa score between 0.2 and 0.40 is regarded as fair, a Kappa score between 0.4 and 0.6 is regarded as moderate, a Kappa score between 0.6 and 0.8 is regarded as substantial between observers and a Kappa score > 0.8 represents an excellent agreement.

1. Landis JR, Koch GG: **The measurement of observer agreement for categorical data.** *Biometrics* 1977, **33**(1):159-174.

**Supplementary table 1:** Inter-observers reproducibility for molecular variables measured by Kappa statistic

| Variable                            | Kappa | Standard error | Sig.  | CI 95%      |
|-------------------------------------|-------|----------------|-------|-------------|
| E-cadherin protein expression       | 0,894 | 0,039          | 0,000 | 0,819-0,970 |
| E-cadherin localization             | 0,816 | 0,052          | 0,000 | 0,714-0,918 |
| $\beta$ -catenin protein expression | 0,746 | 0,057          | 0,000 | 0,634-0,859 |
| $\beta$ -catenin localization       | 0,788 | 0,060          | 0,000 | 0,672-0,905 |
| N-cadherin protein expression       | 0,881 | 0,041          | 0,000 | 0,800-0,961 |
| N-cadherin localization             | 0,822 | 0,056          | 0,000 | 0,711-0,932 |
| Snail1 protein expression           | 0,894 | 0,039          | 0,000 | 0,818-0,970 |
| Snail2 protein expression           | 0,878 | 0,042          | 0,000 | 0,796-0,960 |
| Twist1 protein expression           | 0,880 | 0,041          | 0,000 | 0,799-0,961 |
| FoxC2 protein expression            | 0,832 | 0,034          | 0,000 | 0,734-0,866 |
| Vimentin protein expression         | 0,826 | 0,120          | 0,000 | 0,590-1,062 |

**Supplementary table 2:** Intra-observers reproducibility for molecular variables measured by Kappa statistic

| Variable                            | OBSERVER 1 |                |       |             | OBSERVER 2 |                |       |             |
|-------------------------------------|------------|----------------|-------|-------------|------------|----------------|-------|-------------|
|                                     | Kappa      | Standard error | Sig.  | CI 95%      | Kappa      | Standard error | Sig.  | CI 95%      |
| E-cadherin protein expression       | 0.940      | 0.030          | 0.000 | 0.875-0.985 | 0.954      | 0.027          | 0.000 | 0.893-0.998 |
| E-cadherin localization             | 0.901      | 0.039          | 0.000 | 0.818-0.967 | 0.965      | 0.025          | 0.000 | 0.910-0.999 |
| $\beta$ -catenin protein expression | 0.925      | 0.032          | 0.000 | 0.863-0.985 | 0.955      | 0.026          | 0.000 | 0.895-0.990 |
| $\beta$ -catenin localization       | 0.946      | 0.030          | 0.000 | 0.877-0.999 | 0.914      | 0.040          | 0.000 | 0.823-0.980 |
| N-cadherin protein expression       | 0.955      | 0.025          | 0.000 | 0.896-0.998 | 0.955      | 0.027          | 0.000 | 0.895-0.999 |
| N-cadherin localization             | 0.919      | 0.040          | 0.000 | 0.830-0.980 | 0.914      | 0.040          | 0.000 | 0,823-0,980 |
| Snail1 protein expression           | 0.955      | 0.026          | 0.000 | 0.895-0.998 | 0.938      | 0.030          | 0.000 | 0.874-0.985 |
| Snail2 protein expression           | 0.863      | 0.045          | 0.000 | 0,765-0.940 | 0.924      | 0.034          | 0.000 | 0.849-0.984 |
| Twist1 protein expression           | 0.940      | 0.029          | 0.000 | 0,879-0.985 | 0.955      | 0.033          | 0.000 | 0.860-0.984 |
| FoxC2 protein expression            | 0.983      | 0.026          | 0.000 | 0.942-0.999 | 0.932      | 0.033          | 0.000 | 0.860-0.984 |
| Vimentin protein expression         | 1          | 0.000          | 0.000 | 1,000-1,000 | 1          | 0.000          | 0.000 | 1,000-1,000 |
